1 **Delayed Healthcare Seeking and Associated Factors for Common Childhood**  
2 **Illnesses among Caregivers with Under-Five Children in Southwestern**  
3 **Ethiopia, 2023.**

4 Gamechu Atomsa Hunde<sup>1\*</sup> Kalkidan Fikadu<sup>2</sup> Tigist Demeke<sup>1</sup>

5 <sup>1</sup>School of Nursing, Faculty of Health Sciences, Jimma University Institute of Health, Jimma Ethiopia.

6 <sup>2</sup>Department of Pediatric Nursing, School of Nursing College of Medicine and Health Sciences Wachemo  
7 University, Hossana, Ethiopia.

8

9

10

11

12

13 **\*Corresponding Author**

14 Gamechu Atomsa Hunde

15 Email: [gladgameato@gmail.com](mailto:gladgameato@gmail.com)

16 PO.Box: 378

17

18

19

20

21

22

23

24

25

26

27

28

29

30

## 31 Abstract

32 **Background:** For under-five children, receiving timely and appropriate medical attention is  
33 crucial in preventing serious and fatal complications. Unfortunately, evidence shows that  
34 parents of young children frequently delay seeking care, contributing to the death of many  
35 kids before they even get to a medical facility.

36 **Objectives:** The study aimed to assess delay in healthcare seeking and associated factors for  
37 common childhood illnesses among caregivers with under-five children visiting Yem special  
38 woreda public health facilities, 2023.

39 **Methods:** A facility-based cross-sectional study was conducted among 333 caregivers of  
40 under-five children diagnosed with common childhood illnesses visiting Yem special woreda  
41 public health facilities. Systematic random sampling was employed and data collection was  
42 carried out using an interviewer-administered questionnaire. Delay was characterized as a  
43 long time (typically >24 hours) between disease onset and start of the necessary treatment.  
44 Data was entered using Epi Data version 4.7 and exported to Statistical Package for the Social  
45 Sciences version 25.0. Bi-variable and multivariable logistic regression analyses were  
46 conducted to identify the factors that influence the delay in healthcare seeking. Adjusted odds  
47 ratios with a 95% confidence interval were used to determine the associations. Statistically  
48 significant variables were identified based on a p-value < 0.05.

49 **Results:** A total of 326 caregivers participated in the study with a response rate of 98%. The  
50 proportion of delayed health care seeking was 74.5%. Child  $\geq$  12 months (AOR =1.99, 95%  
51 CI: 1.11-3.57), rural residence (AOR = 2.41, 95% CI: 1.35-4.28), no community health  
52 insurance (AOR = 1.91, 95% CI: 1.07-3.42), traditional treatment (AOR = 2.98, 95% CI: 1.46-  
53 6.10), and self-medication at home first (AOR = 2.73, 95% CI: 1.32-5.63) and perceiving  
54 illness as mild (AOR= 2.64, 95% CI: 1.28-5.42) were factors associated with delayed  
55 healthcare seeking.

56 **Conclusion and recommendation:** The study showed delay in health care seeking for  
57 common childhood illnesses among caregivers was high. Hence, reducing delays necessitates  
58 the implementation of public education campaigns, collaboration with local organizations,  
59 and the provision of counseling for caregivers regarding childhood illnesses.

60 **Key Words:** *Delay in care seeking, common childhood illnesses, Under-five Children, Ethiopia.*

61

## 62 INTRODUCTION

63 Childhood illnesses encompass any sickness, disability, or abnormality that occurs during  
64 the developmental period from fetus to adolescence (1). Common childhood illnesses are  
65 infectious diseases that are significant causes of morbidity and mortality in under five  
66 children worldwide, especially in low- and middle-income nations (2).

67 Malaria, pneumonia, and diarrhea are among the most common infectious diseases that  
68 exhibit a high susceptibility in young children and a prominent contributors to childhood  
69 mortality (3, 4). Prevention of these diseases requires access to essential interventions like  
70 nutrition, vaccination, breastfeeding, hygiene, reducing air pollution, and affordable drugs.  
71 Additionally, effective treatments for pneumonia, malaria, and diarrhea include  
72 Amoxicillin tablets, artemisinin-based combination therapy (ACT), oral rehydration salts  
73 (ORS), and zinc respectively (5-7).

74 The burden of illness and subsequent death from treatable diseases can be reduced by  
75 timely medical care (8). Caregiver delays in seeking medical care can have detrimental  
76 effects on children's health and diminish the safety and efficacy of medical interventions  
77 (9, 10). This delay is often defined as a significant period, typically exceeding 24 hours,  
78 between the onset of illness and the commencement of essential treatment (11).

79 In order to enhance the accessibility of comprehensive primary healthcare and mitigate  
80 prevalent childhood illnesses, the World Health Organization (WHO) and the United  
81 Nations Children's Fund (UNICEF) have collaboratively formulated the Integrated  
82 Management of Childhood Illness (IMCI) strategy (12). Ethiopia is currently incorporating  
83 these strategies within its primary healthcare and health extension programs (13).

84 Healthcare services for common childhood illnesses were usually underutilized and  
85 accessed with delays (14). The delay in accessing healthcare services encompasses  
86 challenges related to recognizing the disease, making decisions about seeking care and  
87 arranging transportation to healthcare facilities (15). Delayed healthcare for children's

88 illnesses, even when services are accessible, results in preventable illnesses, mortality, and  
89 economic burdens (16, 17). The postponement of seeking medical care for children under  
90 five years old may lead to severe and potentially fatal complications (18, 19). A significant  
91 number of under-five deaths are related to preventable or treatable conditions, and delayed  
92 healthcare seeking by caregivers can exacerbate these issues. A considerable proportion of  
93 childhood mortality is attributable to delays in accessing healthcare, indicating insufficient  
94 advancement in reducing child fatality rates (20).

95 In 2021, global under-five mortality reached 5.0 million, with significant disparities  
96 observed based on the child's country of birth (21, 22). Sub-Saharan Africa has the worst  
97 rate, registering 74 deaths per 1,000 live births, 15 times higher than Europe/North America  
98 and 19 times higher than Australia/New Zealand respectively (21).

99 Common childhood illnesses such as pneumonia, diarrhea, and malaria collectively  
100 accounted for nearly 30% of global under-five deaths in 2019, with Africa being  
101 responsible for a million deaths annually due to these conditions (3, 23). In 2023, in  
102 Ethiopia, approximately 22.5% of children under five suffer from common childhood  
103 illnesses such as acute respiratory infections (ARI), diarrhea, and fever (24). Efforts to  
104 address this issue include improving healthcare accessibility, enhancing healthcare  
105 education for caregivers, and promoting early intervention and preventive care for children.  
106 Organizations and governments around the world continue to work towards reducing  
107 under-five mortality rates by addressing these and other related challenges (25).

108 While Ethiopia has made progress in reducing child mortality through various  
109 interventions, including immunization and disease prevention programs, high child  
110 mortality rates persist, especially among underserved populations (26, 27). Ethiopia has set  
111 a target to reduce the child mortality rate to below 20 per 1,000 live births by the year 2035  
112 (26).

113 Studies conducted across different nations indicate that mothers and primary caregivers  
114 tend to delay seeking healthcare for their children's illnesses. In Cameroon, it was recorded  
115 that 88.1% of caregivers experienced a delay in seeking healthcare for common childhood

116 illnesses (28). In Nepal, this delay was reported as 62.7% (29), while in Bhubaneswar, the  
117 delay was found to be 15.77% (30).

118 In Ethiopia, evidences shows a significant proportion of delay for common childhood  
119 illnesses, with proportions ranging from 86.3% in Jeldu district, Oromia region, 73.5% in  
120 Addis Ababa, and 73% in Northwest Ethiopia's, Aneded district (31-33). Factors such as  
121 lack of access to healthcare, insufficient awareness of when to seek medical help, and  
122 economic barriers can all contribute to delays in seeking healthcare for children.  
123 Additionally, in some regions, cultural or social factors may also play a role in delaying  
124 healthcare seeking (28, 34, 35).

125 While studies have examined the delay in seeking care for common childhood illnesses in  
126 certain regions of the country (34, 35), it is essential to understand the variations of each  
127 factor within different cultures, environments, and communities to enhance early  
128 healthcare practices (36). Thus, this study aimed to assess delays in healthcare-seeking and  
129 associated factors for common childhood illnesses among caregivers of under-five children  
130 in Yem special woreda public health facilities.

## 131 **METHODS AND MATERIALS**

### 132 **Study area and period**

133 The study was conducted from June 1-30, 2023 in Yem Special Woreda, situated  
134 approximately 297 kilometers southwest of Addis Ababa. It comprises one town  
135 administration, three municipalities, and 34 rural kebeles. Based on unpublished data  
136 obtained from the Yem special woreda finance and development office in 2022, the total  
137 population of the area is 116,044 individuals, including 18,244 children under the age  
138 of five.

139 The Woreda has one primary hospital (Saja Primary Hospital) which serves a population  
140 of 32,234 and five health centers/ HC (Fofa, Semonama, Toba, Deri, and Gesi) (37).  
141 The hospital operates with a total staff of 240 and offers a range of services, including  
142 one under-five outpatient unit (OPD), adult OPD, psychiatry OPD, emergency OPD, x-

143 ray, ophthalmology OPD, ANC and family planning, delivery ward, neonatal intensive  
144 care unit (NICU), laboratory, ART and TB, pharmacy as well as adult and pediatric  
145 inpatient unit services. The HCs in the Woreda provide primary healthcare services in  
146 under-five OPD, adult OPD, Maternity and delivery, laboratory, and pharmacy units.

## 147 **Study Subjects and Procedures**

148 The study employed a health facility-based cross-sectional study among caregivers of  
149 under-five children diagnosed with common childhood illnesses visited under-five OPD  
150 at Yem special woreda public health facilities during the study period. Caregivers who  
151 visit the health facilities with appointment or comeback for follow up without new  
152 complaint and whose child needed urgent referral was excluded from the study. The  
153 largest sample size for the study was estimated using single proportion formula  
154 assuming a 95% confidence level, margin of error of 5%, and a proportion  $p=73\%$  from  
155 a study of delay in seeking healthcare behavior for common childhood illnesses in  
156 Aneded district, Northwest Ethiopia (38). Considering 10% non-response rate, the final  
157 sample size was 333. A systematic random sampling method was applied to select the  
158 eligible caregivers after proportionally allocating number caregivers to be selected from  
159 each health facility. Accordingly, 149 caregivers from Saja Hospital, 43 from Fofa  
160 health center, 37 from Semonama health center, 48 from Toba and 56 care givers from  
161 Deri health center were selected by systematic random sampling. The caregivers were  
162 interviewed keeping the interval of 2 between consecutive caregivers whose child was  
163 diagnosed with one of common childhood illness (pneumonia, malaria or diarrhea) by  
164 doctors/health care providers.

## 165 **Operational definitions**

166 **Health care-seeking:** getting care from a qualified health care professional at government  
167 health centers or private hospitals/ clinics (39).

168 **Delay in healthcare-seeking:** care that is sought from medical facilities more than 24  
169 hours after becoming aware of symptoms (31, 34, 35).

170 **Common childhood illnesses:** ARI, diarrheal disorders, and febrile illnesses are the  
171 common childhood illnesses in this study ([31](#)).

172 **First of choice treatment:** defined as the setting where a caregiver makes their initial  
173 contact after the child becomes unwell (health institutions, traditional healers, self-  
174 medication, religious places) ([40](#)).

175 **Self-medication:** is when mothers become aware of their children's sickness, begin all  
176 available treatments, and apply them without a healthcare professional's prescription ([39](#)).

177 **Traditional medicine:** traditional healers, wogesha, herbalists, and magicians (holy water)  
178 handle patients with apparent illnesses and sickness using experience-based knowledge and  
179 practice ([39](#)).

180 **Perceived severity of illness:** subjective assessment of the child's level of discomfort by  
181 the caregiver; classified as mild, moderate, or severe based on the caregivers' ([29](#)).

182 **Good Knowledge of general danger signs:** if mothers were able to mention more than  
183 three of the nine danger signs identified by the WHO such as not able to breastfeed/ unable  
184 to drink or eat, vomits everything, had convulsions/ convulsing now, lethargic or  
185 unconscious, fast breathing, severe chest in drawing, fever, low body temperature,  
186 movement only when stimulated or no movement even when stimulated otherwise it is  
187 poor ([41](#), [42](#)).

188 **Monthly income:** classified according to the Ethiopian civil service proclamation into  
189 three categories: low income (<3000 ETB), medium income (3000-7500 ETB), and high  
190 income (>7500 ETB) ([43](#)).

## 191 **Data collection Tool and procedures**

192 The questionnaire was developed by reviewing relevant literature ([19](#), [28](#), [33](#), [34](#)). A  
193 structured interview administered questionnaire was employed to collect the data. This  
194 questionnaire has 6 components: socio-demographic characteristics, caregiver's  
195 knowledge and child's illness-related factors, health care access-related factors,

196 caregivers' previous experience-related factors, decision makers' behavior-related  
197 factors, and promptness of care seeking for illness. The questionnaire was prepared in  
198 English and translated to local languages Amharic and Yemissa. Face-to-face exit  
199 interview was conducted in a separated room by one Nurse who has Bachelor of Science  
200 holder in each health facility and supervised by two master's holder nurses.

## 201 **Data processing, analysis, and presentation**

202 The data was checked for completeness, consistency, and errors before proceeding to data  
203 processing and analysis. Data was entered into Epidata version 4.7 and then exported to  
204 SPSS software version 25.0 to conduct data cleaning and analysis. Descriptive analysis  
205 was performed to determine proportions, standard deviations, and frequencies. A binary  
206 logistic regression was used, and bi-variable and multivariable analysis was done.  
207 Variables with p-values less than 0.25 in the bi-variable analysis were taken to  
208 multivariable analysis. Model fitness was checked using the Hosmer–Lemeshow goodness  
209 of the model with p-value found to be greater than 0.05. An odds ratio with a 95%  
210 confidence interval with P-value <0.05 was used to determine the association between the  
211 independent and the outcome variables. Variables that are statistically significant at p-value  
212 < 0.05 were identified as factors for delay in health care seeking. Finally, the result of the  
213 analyses was presented in texts, tables, and charts accordingly.

## 214 **Data quality control**

215 The questionnaire was translated into the local languages of Amharic and Yemissa by  
216 language experts and reviewed by subject matter experts. Then, the Amharic and Yemissa  
217 versions were translated back to English, to verify the consistency. Content validity was  
218 checked by the subject matter experts. A pretest was carried out with 5% of the sample size  
219 (17 caregivers) in Gesi HC a week before the actual data collection time and was excluded  
220 from the actual study. A one-day orientation was provided for data collectors and  
221 supervisors on the purpose of the study, how to approach study subjects, and how to use  
222 the questionnaire. The collected data were reviewed and checked for completeness  
223 everyday by the supervisors and principal investigator.



## 224 **Ethical consideration**

225 Ethical approval was obtained from Institutional Review Board (IRB) of Jimma University  
226 Institute of Health with the letter Ref. No: JUIH/IRB/393/23. A formal letter for permission  
227 and support was obtained from Jimma University School of Nursing to the stakeholders of  
228 Yem special woreda health office. Letter of permission and support was written to each  
229 health facility from Yem special woreda health office. Verbal informed consent was taken  
230 from the study participants before starting the interview after were informed of the purpose,  
231 and benefits of the study. The respondents were notified that they have full right to refuse  
232 or terminate the questionnaire if they feel uncomfortable with the questions at any point  
233 and information from any respondent was kept anonymous and confidential. The collected  
234 data were stored in anonymous way in a secret and secure place. The data would not be  
235 used for another purpose apart from research purposes. Participation is completely  
236 voluntary basis and confidentiality of the information is guaranteed by a secret code and  
237 kept anonymously. The hard copy of the collected data was kept locked cabinet and the  
238 soft copy is secured by a password on the computer.

239

240

## **RESULTS**

### 241 **Socio-demographic characteristics of participants and children**

242 In this study, out of 333 caregivers offered to the interview, 326 caregivers who had  
243 children under the age of five with common childhood illnesses completed the interview  
244 making a response rate of 98%. Among the participants, 186 (57.1%) were between the  
245 25-34 age group, with a mean (SD) age of 31.03 ( $\pm$  6.535) years. One hundred ninety-  
246 two (58.9%) of the children brought to the health facilities were 12 months and older,  
247 with a mean (SD) age of 19 ( $\pm$ 13.704) months. The majority 309 (94.8) of the  
248 participants were married. More than half 171(52.5%) of the participants had attended  
249 primary school, and 155 (47.5%) identified as housewives by their occupation. In terms  
250 of income, 190 (58.3%) participants reported low monthly incomes (<3000 ETB).

251 *(Table 1)*

252 **Table 1:** Socio-demographic characteristics of the study participants and their children  
 253 in Yem special woreda public health facilities, Southwestern Ethiopia, 2023 (N=326).

| Variables             |                                | Frequency(n) | Percent (%) |
|-----------------------|--------------------------------|--------------|-------------|
| Caregivers' age       | 18-24                          | 42           | 12.9        |
|                       | 25-34                          | 186          | 57.1        |
|                       | 35-44                          | 80           | 24.5        |
|                       | ≥45                            | 18           | 5.5         |
| Childs' age           | <12                            | 134          | 41.1        |
|                       | ≥12                            | 192          | 58.9        |
| Sex of child          | Male                           | 156          | 47.9        |
|                       | Female                         | 170          | 52.1        |
| Marital status        | Single                         | 4            | 1.2         |
|                       | Married                        | 309          | 94.8        |
|                       | Divorced                       | 4            | 1.2         |
|                       | Widowed                        | 9            | 2.8         |
| Caregivers' residence | Urban                          | 93           | 28.5        |
|                       | Rural                          | 233          | 71.5        |
| Educational status    | No formal                      | 18           | 5.5         |
|                       | Primary education              | 171          | 52.5        |
|                       | Secondary                      | 71           | 21.8        |
|                       | College and above              | 66           | 20.2        |
| Occupational status   | Housewife                      | 155          | 47.5        |
|                       | Merchant                       | 27           | 8.3         |
|                       | Government                     | 72           | 22.1        |
|                       | Farmer                         | 56           | 17.2        |
|                       | Others <sup>Δ</sup>            | 16           | 4.9         |
| Family monthly income | Low                            | 190          | 58.3        |
|                       | Medium income (3000-75000 ETB) | 116          | 35.6        |
|                       | High income                    | 20           | 6.1         |

|                               |             |     |      |
|-------------------------------|-------------|-----|------|
| Number of family members      | 1-3         | 75  | 23.0 |
|                               | 4-5         | 172 | 52.8 |
|                               | >5          | 79  | 24.2 |
| Number of under-five children | 1           | 273 | 83.7 |
|                               | 2 and above | 53  | 16.3 |

254     <sup>Δ</sup>: Student, daily laborer, driver, and mechanic

## 255     **Caregivers knowledge and child-illness-related Factors**

256     Among the total participants, the majority 278 (85.3%) of the participants had poor  
 257     knowledge of the danger signs of common childhood illnesses. Regarding the children's  
 258     presenting symptoms, 183 (56.3%) had present with cough. Nearly one-third 104  
 259     (31.9%) of the participants perceived their child's illness was caused by  
 260     microorganisms. One hundred twenty-five (38.3%) of the study participants expressed  
 261     a preference to seek initial medical care for their sick children at a health institution.  
 262     More than one-third of participants 118 (36.2%) rated their child's illness as moderate.  
 263     **(Table 2)**

264     ***Table 2: Caregivers' knowledge and child-illness-related factors in Yem special woreda***  
 265     ***public health facilities, Southwestern Ethiopia, 2023 (N=326).***

| Variables                                    |                                                         | Frequency(n) | Percent (%) |
|----------------------------------------------|---------------------------------------------------------|--------------|-------------|
| Knowledge of danger sign                     | Poor                                                    | 278          | 85.3        |
|                                              | Good                                                    | 48           | 14.7        |
| The child's presenting symptoms <sup>*</sup> | Cough                                                   | 183          | 56.3        |
|                                              | Fever (His/her body feels hotter than in a normal case) | 128          | 39.4        |
|                                              | Vomiting                                                | 53           | 16.3        |
|                                              | Diarrhea (three or more loose or watery stools per day) | 26           | 8.0         |
|                                              | Others <sup>Δ</sup>                                     | 10           | 3.1         |
| Caregiver's perceived                        | Evil eyes                                               | 29           | 8.9         |

|                                                          |                                                  |     |      |
|----------------------------------------------------------|--------------------------------------------------|-----|------|
| cause of recent illness                                  | Poor hygiene and sanitation                      | 102 | 31.3 |
|                                                          | Microorganisms                                   | 104 | 31.9 |
|                                                          | Cold                                             | 56  | 17.2 |
|                                                          | I don't know                                     | 18  | 5.5  |
|                                                          | Others <sup>B</sup>                              | 17  | 5.2  |
| Caregiver's first choice of treatment for recent illness | Take to health institution                       | 125 | 38.3 |
|                                                          | Take to traditional treatment                    | 88  | 27.0 |
|                                                          | Self-treatment at home                           | 84  | 25.8 |
|                                                          | Did nothing                                      | 29  | 8.9  |
| Caregivers' perception of the severity of the illness.   | Mild                                             | 112 | 34.4 |
|                                                          | Moderate                                         | 118 | 36.2 |
|                                                          | Severe                                           | 96  | 29.4 |
| Perceived severity indicator (n=96)                      | The child refused to suck my breast or eat foods | 38  | 39.6 |
|                                                          | The illness continues for a long                 | 32  | 33.3 |
|                                                          | When a child's behavior changes                  | 22  | 22.9 |
|                                                          | Others <sup>C</sup>                              | 4   | 4.2  |

266 <sup>\*</sup>: variable with multiple responses, <sup>A</sup>: difficulty of breathing, lethargy <sup>B</sup>: curse from  
 267 God, teething, weaning, <sup>C</sup>: Fast breathing, blood stool, vomiting

### 268 Caregivers' previous experiences related factors

269 More than half, 184 (56.4%) participants got information about early treatment seeking  
 270 and healthcare providers are the main source of information for majority of them. One  
 271 hundred thirty (39.9%) participants reported that their children encountered illness in  
 272 the last 6 months. Most of the caregivers, 90 (69.2%) visited a health facility for the  
 273 illness their child encountered in the last 6 months. (**Table 3**)

274 **Table 3:** Caregivers' previous experiences-related factors in Yem special woreda public  
 275 health facilities, Southwestern Ethiopia, 2023 (N=326).

| Variables | Frequency(n) | Percent (%) |
|-----------|--------------|-------------|
|-----------|--------------|-------------|

|                                                 |                                                                                      |     |      |
|-------------------------------------------------|--------------------------------------------------------------------------------------|-----|------|
| Get information about early health care seeking | Yes                                                                                  | 184 | 56.4 |
|                                                 | No                                                                                   | 142 | 43.6 |
| Source of information *                         | Health care provider                                                                 | 147 | 80.3 |
|                                                 | Radio                                                                                | 20  | 10.9 |
|                                                 | Television                                                                           | 9   | 4.9  |
|                                                 | Family                                                                               | 10  | 5.5  |
|                                                 | Neighbor                                                                             | 11  | 6.0  |
|                                                 | Social media (Facebook, Telegram, YouTube)                                           | 6   | 3.3  |
| Child illness in the last 6 months              | Yes                                                                                  | 130 | 39.9 |
|                                                 | No                                                                                   | 196 | 60.1 |
| Visited a health facility (n=130)               | Yes                                                                                  | 90  | 69.2 |
|                                                 | No                                                                                   | 40  | 30.8 |
| Previous visit help for today's visit(n=90)     | Yes                                                                                  | 65  | 72.2 |
|                                                 | No                                                                                   | 25  | 27.8 |
| How the previous visit helped (n=65)            | Counseled about the importance of visiting a health facility for childhood illnesses | 43  | 66.2 |
|                                                 | Told the danger of not visiting a health facility                                    | 22  | 33.8 |
| How the child cured of illness (n=40)           | Take to traditional                                                                  | 11  | 27.5 |
|                                                 | Self-treatment at home                                                               | 18  | 45.0 |
|                                                 | Treat the child with drug buying from pharmacies                                     | 7   | 17.5 |
|                                                 | Resolved by itself                                                                   | 4   | 10.0 |

276 \*: variable with multiple responses

## 277 **Healthcare access-related factors**

278 In this study, more than half 169 (51.8%) of the participants lived at more than 60  
 279 minutes of walking distance from a health facility, in contrast, 157 (48.2%) participants  
 280 lived within a walking distance of 60 minutes or less from a health facility. The majority,  
 281 303 (92.9%) of the participants expressed their preference for seeking healthcare at

282 government health facilities while 23 (7.1%) participants, indicated a preference for  
 283 private health facilities. Out of 23 participants who prefer private facilities, 18 (78.3%)  
 284 of them believe treatment in the private is more effective and the remaining being nearby  
 285 private facilities. Regarding community health insurance, 196 (60.1%) of participants  
 286 had no community health insurance whereas 130 (39.9%) of participants had  
 287 community health insurance.

## 288 **Decision makers' behavior-related factors**

289 One hundred seventy-nine (54.9%) of the participants reported that mothers held the  
 290 primary responsibility for making decisions regarding medical treatment for their  
 291 children. Most 260 (79.8) of the decision makers do not consume khat and 265 (81.3)  
 292 do not smoke cigarettes. Nearly half 155 (47.5) of the decision makers reported not  
 293 consuming alcohol in the last 13 months. (*Table 4*)

294 *Table 4: Decision makers' behavior-related factors in Yem special woreda public health*  
 295 *facilities, Southwestern Ethiopia, 2023 (N=326).*

| Variables               |                         | Frequency(n) | Percent (%) |
|-------------------------|-------------------------|--------------|-------------|
| Decision maker          | Mother                  | 179          | 54.9        |
|                         | Father                  | 82           | 25.2        |
|                         | Both mothers and father | 46           | 14.1        |
|                         | Grandparent             | 19           | 5.8         |
| Khat chewing            | Yes                     | 66           | 20.2        |
|                         | No                      | 260          | 79.8        |
| Smoking status          | Every day               | 34           | 10.4        |
|                         | Some days               | 27           | 8.3         |
|                         | Not at all              | 265          | 81.3        |
| Alcohol drinking status | Almost every day        | 59           | 18.1        |
|                         | At least once a week    | 82           | 25.2        |
|                         | Less than once a week   | 30           | 9.2         |

|  |                            |     |      |
|--|----------------------------|-----|------|
|  | None in the last 13 months | 155 | 47.5 |
|--|----------------------------|-----|------|

296

### 297 **Promptness of healthcare-seeking**

298 About 243 participants reported the signs /symptoms of the illness started more than 24  
299 hrs before the time of seeking care. Therefore, the proportion of delayed healthcare  
300 seeking among the study participants was 74.5% (95% CI: 69.8-79.3). More than half  
301 176 (54.0%) of caregivers arrived 2-3 days after symptoms started. The primary reason  
302 behind the delay in seeking healthcare was the expectation among 163 (67.1%)  
303 participants that the illness would improve by itself. Additionally, other significant  
304 reasons for the delay encompassed a reliance on traditional treatments 27 (11.1%),  
305 unable to decide by themselves 19 (7.8%), treatment with over-the-counter medication  
306 6 (2.5%), and financial constraints experienced by 28 (11.5%) participants. (*Figure 1*)

307

### 308 **Factors associated with delay in healthcare seeking for common childhood illnesses** 309 **among caregivers with under-five children.**

310 In this study, the odds of delayed health care seeking were 1.99 times (AOR = 1.99,  
311 95% CI: 1.11-3.57) higher among caregivers who had a child  $\geq$  12 months than  
312 caregivers who had <12 months. The finding also revealed caregivers who reside in  
313 rural had 2.41 times (AOR = 2.41, 95% CI: 1.35-4.28) higher odds of delayed health  
314 care seeking than those who reside in urban. On the other hand, the odds of delayed  
315 care-seeking were 2.98 times (AOR = 2.98, 95% CI: 1.46-6.10) higher for caregivers  
316 who used traditional treatment first, and 2.73 times (AOR = 2.73, 95% CI: 1.32-5.63)  
317 higher for those who tried self-medication at home first, as compared to going to a health  
318 facility first.

319 In similar ways the finding of this study revealed that caregivers who perceived child  
320 illness as mild had 2.64 times (AOR = 2.64, 95% CI: 1.28-5.42) higher odds of delayed

321 health care seeking than caregivers who perceived it as severe. Furthermore, the odds  
 322 of delayed health care seeking were 1.91 times (AOR = 1.91, 95% CI: 1.07-3.42) higher  
 323 among care givers who have no community health insurance than those who have  
 324 community health insurance. (**Table 5**)

325 **Table 5:** Bi-variable and multi-variable logistic regression analysis of delay in health  
 326 care seeking for childhood illnesses among caregivers of under-five children in Yem  
 327 special woreda public health facilities, Southwestern Ethiopia, 2023 (N=326).

| Variables                                    |                                | Delayed healthcare seeking |    | COR (95%CI)     | AOR (95% CI)           | P-value      |
|----------------------------------------------|--------------------------------|----------------------------|----|-----------------|------------------------|--------------|
|                                              |                                | YES                        | NO |                 |                        |              |
| Child age                                    | ≥12months                      | 157                        | 35 | 2.50(1.51-4.16) | <b>1.99(1.11-3.57)</b> | <b>.022*</b> |
|                                              | <12months                      | 86                         | 48 | 1               | 1                      |              |
| Caregiver residence                          | Rural                          | 187                        | 46 | 2.69(1.59-4.54) | <b>2.41(1.35-4.28)</b> | <b>.003*</b> |
|                                              | Urban                          | 56                         | 37 | 1               | 1                      |              |
| Family monthly income                        | Low income (<3000 ETB)         | 147                        | 43 | 1.84(.69-4.90)  | 1.77(.58-5.41)         | .317         |
|                                              | Medium income (3000-75000 ETB) | 83                         | 33 | 1.35(.496-3.69) | 1.30(.43-3.96)         | .641         |
|                                              | High income (>7500)            | 13                         | 7  | 1               | 1                      |              |
| Knowledge of danger signs                    | Poor                           | 212                        | 66 | 1.76(.92-3.38)  | 1.47(.70-3.07)         | .310         |
|                                              | Good                           | 31                         | 17 | 1               |                        |              |
| First choice of treatment for recent illness | Traditional treatment          | 74                         | 14 | 3.19(1.62-6.26) | <b>2.98(1.46-6.10)</b> | <b>.003*</b> |
|                                              | Self-treatment at home         | 70                         | 14 | 3.01(1.53-5.94) | <b>2.73(1.32-5.63)</b> | <b>.007*</b> |
|                                              | Did nothing                    | 21                         | 8  | 1.58(.65-3.86)  | 1.01(.38-2.66)         | .985         |
|                                              | Health institution             | 78                         | 47 | 1               | 1                      |              |



|                                                  |             |     |    |                 |                        |              |
|--------------------------------------------------|-------------|-----|----|-----------------|------------------------|--------------|
| Information about early health care seeking      | No          | 111 | 31 | 1.41(.85-2.35)  | 1.11(.62-1.99)         | .715         |
|                                                  | Yes         | 132 | 52 | 1               | 1                      |              |
| Caregiver's perceived severity of the illness    | Mild        | 96  | 16 | 3.44(1.76-6.75) | <b>2.64(1.28-5.42)</b> | <b>.008*</b> |
|                                                  | Moderate    | 86  | 32 | 1.54(.86-2.76)  | 1.31(.70-2.46)         | .406         |
|                                                  | Sever       | 61  | 35 | 1               | 1                      |              |
| Distance to the health facility (within walking) | >60 minutes | 131 | 38 | 1.39(.84-2.28)  | 1.08(.60-1.94)         | .809         |
|                                                  | ≤60 minutes | 112 | 45 | 1               | 1                      |              |
| Having community health insurance                | No          | 159 | 37 | 2.35(1.42-3.91) | <b>1.91(1.07-3.42)</b> | <b>.028*</b> |
|                                                  | Yes         | 84  | 46 | 1               | 1                      |              |

328 1: Reference category, AOR: Adjusted odd ratio, COR: Crude odd ratio, CI: confidence interval,  
 329 Bold\*-P value <0.05.

330

331

## DISCUSSION

332 In this cross-sectional study, it was detected that 74.5% (95% CI: 69.8-79.3) of  
 333 caregivers delayed seeking healthcare for common childhood illnesses in children under  
 334 the age of five. These findings indicate a substantial proportion of caregivers exhibit a  
 335 delay in seeking necessary healthcare.

336 The current finding is consistent with previous studies conducted in the Aneded district  
 337 of Northern Ethiopia, and Addis Ababa where the proportion of delayed healthcare  
 338 seeking for common childhood illnesses was reported at 73% and 73.3%, respectively  
 339 ([32](#), [33](#)). This consistency in findings could be attributed to the proximity of caregivers'  
 340 perception of the severity of illness within the Ethiopian context. If caregivers perceive  
 341 the illness as mild, they are more likely to delay seeking care ([34](#)).

342 The results of this study indicate a higher proportion of delayed healthcare-seeking  
 343 among caregivers compared to the study conducted in Nepal, which reported a  
 344 proportion of 62.7% ([29](#)). This disparity might be due to variations in caregivers'  
 345 preferences for healthcare facilities as evidence shows caregivers utilizing public health

346 facilities are more likely to delay seeking medical care compared to those utilizing  
347 private health facilities (36). The findings of the present study indicated a significant  
348 preference among caregivers for public health facilities compared to the previous study.

349 Similarly the current study is higher than the study conducted in Bhubaneswar, where  
350 the proportion was 15.77% (30). This disparity could potentially be attributed to  
351 differences in awareness creation efforts. In the present study area, it was observed that  
352 the local institution did not conduct regular organization of role plays and awareness  
353 camps, an observation which differs from the practices noted in the previous study area  
354 (30).

355 In contrast, the present study revealed a lower proportion of delayed healthcare seeking  
356 when compared to previous studies conducted in the Jeldu district, Oromia region,  
357 where a proportion of 86.3% was reported (31). The variation observed may be  
358 attributed to the difference in educational status among caregivers, as evidence shows  
359 more delayed healthcare-seeking among caregivers with lower educational levels (19).  
360 The earlier study documented a notably greater percentage of caregivers with primary  
361 education or no formal education in comparison to the present study (31).

362 The proportion of delayed healthcare seeking in current study is also lower than a study  
363 conducted in Cameroon, which reported a proportion of 88.1% (28). This disparity  
364 could be attributed to differences in the timing of the studies. Previous research was  
365 carried out during the COVID-19 (Coronavirus Disease 2019) pandemic, which has  
366 resulted in widespread disruptions to healthcare systems. These disruptions include  
367 decreased access to healthcare facilities, concerns about contracting the virus,  
368 diminished financial capacity to afford healthcare, and alterations in healthcare-seeking  
369 behaviors. (44, 45).

370 The findings of this study revealed caregivers of children  $\geq 12$  months were more likely  
371 to delay seeking healthcare compared to caregivers of infants below 12 months. This  
372 observation aligns with studies conducted in Nekemte (34) and Tanzania (46). The  
373 underlying reasons for this may be attributed to caregivers often prioritize the care of

374 younger infants, holding the belief that children older than one year of age are more  
375 resilient to illness (34). Furthermore, caregivers may possess an awareness that younger  
376 children are more susceptible to severe illnesses, which could contribute to their prompt  
377 healthcare-seeking behavior for infants below 12 months (47, 48).

378 The present study revealed a higher likelihood of healthcare-seeking delay among  
379 caregivers residing in rural areas compared to those in urban settings, which aligns with  
380 findings from previous studies conducted in Nekemte town (34), Bahir Dar city (35),  
381 Hawassa (49), Kaduna Nigeria (50), and India (51). This might be due to variations in  
382 the accessibility of public health services, resulting from geographical distance and  
383 media exposure (52). Moreover, it could also be due to challenges posed by poverty and  
384 limited healthcare access in rural areas (53). In contrast, urban households tend to  
385 benefit from better accessibility to healthcare services (54).

386 On the other hand, the findings of this study showed that caregivers who lack  
387 community health insurance are more likely to delay seeking healthcare in comparison  
388 to those who have community health insurance. This result is in line with previous  
389 studies conducted in Nekemte and Debre Markos town (34, 55). The reason might be  
390 being uninsured creates concerns about the financial burden associated with seeking  
391 healthcare as community-based health insurance significantly reduces healthcare costs  
392 (34, 56).

393 The findings of this study showed that the odds of delayed healthcare-seeking are  
394 increased when caregivers resort to traditional medicine or self-medication. This result  
395 aligns with previous studies conducted in Bahir Dar and Nekemte (34, 35). The  
396 underlying reasons for this can be attributed to cultural beliefs that promote the use of  
397 home remedies and traditional medicine as the initial and acceptable form of treatment,  
398 as well as the community's adherence to religious beliefs and practices (36). Moreover,  
399 caregivers' perceptions regarding the effectiveness of traditional treatments may  
400 contribute to this trend (57). Home remedies are often perceived as cost-effective and  
401 easily obtainable (58).

402 Consistent with a study conducted in Nekemte (34), the present study identified that  
403 caregivers who perceived their child's illness as mild exhibited a higher likelihood of  
404 delayed healthcare-seeking, compared to those who perceived the illness as severe. This  
405 might be due to caretakers tend to seek care from health facilities more frequently when  
406 they believe their children are seriously ill, as they want to prevent any potential  
407 complications (29). Moreover, this phenomenon may be ascribed to caregivers'  
408 conviction that their child's illness will spontaneously ameliorate over time, prompting  
409 them to adopt a "wait-and-see" approach until further symptoms manifest (16).

410

411

## 412 **Declarations**

### 413 **Ethics approval and consent to participate**

414 Provided in Methods and Material section of the manuscript.

### 415 **Consent for Publication**

416 Not applicable

### 417 **Availability of Data and Materials**

418 The authors presented data in the main paper and will be available upon request from the  
419 corresponding authors.

### 420 **Competing Interest**

421 The authors claim no competing interests.

### 422 **Funding**

423 The authors received no specific fund for this research article.

### 424 **Authors' contribution**

425 KF - conceived research idea, questionnaire design, conducted the fieldwork, analyzed the data,  
426 interpretation of results, results and discussion writing.

427 GAH- contributed to the revision of the research and questionnaire design, supervision of fieldworks,  
428 involved in statistical analysis, and development of the manuscript.

429 TD - contributed to the revision of the research and questionnaire design, supervision of fieldworks,  
430 involved in statistical analysis, and development of the manuscript.

431 All authors read and approved the final manuscript.

## 432 **Authors Information**

433 <sup>1</sup>School of Nursing, Faculty of Health Science, Jimma Institute of Health, Jimma University, Jimma  
434 Ethiopia.

435 <sup>2</sup>Department of Pediatric Nursing, School of Nursing College of Medicine and Health Sciences Wachemo  
436 University, Hossana, Ethiopia.

## 437 **Acknowledgment**

438 The authors are grateful to Jimma University, Institute of Health, Faculty of Health Sciences,  
439 School of Nursing. We also want to express our sincere appreciation to the Yem special woreda  
440 health office and the stakeholders in health facilities for their cooperation. We would like to thank  
441 the data collectors and supervisors. Finally, we are thankful to the study participants who  
442 generously volunteered their time.

## 443 **References**

- 444 1. Meadow SR E, Chester Monroe and Barnett, Henry Lewis. "childhood disease and disorder".  
445 Encyclopedia Britannica. 1 May, 2017.
- 446 2. Getahun GK, Abebil F, Mahmud S, Firdawok E. Magnitude of Common Childhood Illness, Health  
447 Care Seeking Behavior, and Associated Factors in Efratana Gidim District, East Amhara, Ethiopia, 2020.  
448 International Journal of Nanotechnology and Nanomedicine. 2022;7(1):100-11.
- 449 3. UNICEF. Childhood Diseases, maternal, newborn and child survival. 2019.
- 450 4. Miller NP, Amouzou A, Tafesse M, Hazel E, Legesse H, Degeffie T, et al. Integrated community  
451 case management of childhood illness in Ethiopia: implementation strength and quality of care. The  
452 American journal of tropical medicine and hygiene. 2014;91(2):424-34.
- 453 5. Akuiyibo SM, Anyanti J, Amoo BA, Aizobu D, Idogho O. Common childhood illnesses: a cross-  
454 sectional study of commodity stocking patterns and management knowledge among patent and  
455 proprietary medicine vendors in Nigeria. Archives of Public Health. 2022;80(1):1-10.
- 456 6. Organization WH. Diarrhoeal disease in children.Fact sheets. 2 May, 2017.
- 457 7. Treleaven E, Liu J, Prach LM, Isiguzo C. Management of paediatric illnesses by patent and  
458 proprietary medicine vendors in Nigeria. Malaria Journal. 2015;14:1-9.
- 459 8. Geldsetzer P, Williams TC, Kirolos A, Mitchell S, Ratcliffe LA, Kohli-Lynch MK, et al. The  
460 recognition of and care seeking behaviour for childhood illness in developing countries: a systematic  
461 review. PLoS One. 2014;9(4):e93427.
- 462 9. Geldsetzer P, Williams TC, Kirolos A, Mitchell S, Ratcliffe LA, Kohli-Lynch MK, et al. The  
463 Recognition of and Care Seeking Behaviour for Childhood Illness in Developing Countries: A Systematic.  
464 2014.

- 465 10. Wambui WM. Determinants of Health Seeking Behavior Among Caregivers of Infants With Acute  
466 Childhood Illnesses in Kenyatta National Hospital: University of Nairobi; 2017.
- 467 11. Mpimbaza A, Nayiga S, Ndeezi G, Rosenthal PJ, Karamagi C, Katahoire A. Understanding the  
468 context of delays in seeking appropriate care for children with symptoms of severe malaria in Uganda.  
469 PLoS One. 2019;14(6):e0217262.
- 470 12. WHO E. Integrated Management of Childhood Illnesses Module 5, 2015.  
471 [http://www.who.int/maternal\\_child\\_adolescent/topics/child/imci/en/](http://www.who.int/maternal_child_adolescent/topics/child/imci/en/).
- 472 13. Federal Ministry of Health. e. Health Extension Program in Ethiopia-An Institutionalized  
473 Community Approach for Universal Health Coverage. Group WB. 2016. :5 p.
- 474 14. Yeheyis T, Lemma K, Nuramo A, Musema M, Dolmolo A, Aynalem A, et al. Level of modern  
475 health-seeking behavior for common childhood illnesses and its associated factors among mothers of  
476 under-five children in southern Ethiopia: A community based study. Heliyon. 2023;9(9).
- 477 15. Feyisso M, Addisu Y. Prabhanga danger signs of neonatal and postnatal illness and health  
478 seeking. J Curr Res. 2016;8(01):25466-71.
- 479 16. Dagnew AB, Tewabe T, Murugan R. Level of modern health care seeking behaviors among  
480 mothers having under five children in Dangila town, north West Ethiopia, 2016: a cross sectional study.  
481 Italian Journal of Pediatrics. 2018;44:1-6.
- 482 17. Sheka shemsi seid CL, Wiwin Winarni. Caregivers Healthcare Seeking Behavior and Associated  
483 Factors for common Childhood Illness, Haro Gibe Kebele, Asendabo Town, Southwest Ethiopia. August  
484 27, 2021.
- 485 18. Pajuelo MJ, Anticona Huaynate C, Correa M, Mayta Malpartida H, Ramal Asayag C, Seminario JR,  
486 et al. Delays in seeking and receiving health care services for pneumonia in children under five in the  
487 Peruvian Amazon: a mixed-methods study on caregivers' perceptions. BMC health services research.  
488 2018;18:1-11.
- 489 19. Fikire A, Ayele G, Haftu D. Determinants of delay in care seeking for diarrheal diseases among  
490 mothers/caregivers with under-five children in public health facilities of Arba Minch town, southern  
491 Ethiopia; 2019. PloS one. 2020;15(2):e0228558.
- 492 20. Demelash D, Mebratu W. Health care seeking behavior of mothers for common childhood illness  
493 and associated factors in Woldia town administration, Northeast Ethiopia. Fam Med Med Sci Res.  
494 2020;10(1).
- 495 21. United Nations Children's Fund WHO, World Bank Group, United Nations Department of  
496 Economic and Social Affairs, Population Division. Levels & Trends in Child Mortality. Report 2022.
- 497 22. WHO U GWUN. Levels & Trends in Child Mortality-Report 2021. 2021.
- 498 23. Novartis. Day of the African Child 2020,News. Jun 16, 2020.
- 499 24. Chilot D, Diress M, Yismaw Gela Y, Sinamaw D, Simegn W, Andualem AA, et al. Geographical  
500 variation of common childhood illness and its associated factors among under-five children in Ethiopia:  
501 spatial and multilevel analysis. Scientific reports. 2023;13(1):868.
- 502 25. Bhatt J, Bathija P. Ensuring Access to Quality Health Care in Vulnerable Communities. Academic  
503 medicine : journal of the Association of American Medical Colleges. 2018;93(9):1271-5.
- 504 26. Health FMO. National strategy for newborn and child survival ,Addis Ababa, Ethiopia. 2015.
- 505 27. ICF. EPHIa. Ethiopia Mini Demographic and Health Survey 2019.
- 506 28. Tientche B, Nekehforba E, Ngouakam H. Determinants of Delay in Healthcare Seeking for  
507 Common Childhood Illnesses among Caregivers with Under-Five Children in Touboro Health District,  
508 Near Cameroon's Northeastern Border with Chad. International Journal of TROPICAL DISEASE & Health.  
509 2021:1-14.
- 510 29. Tiwari G, Thakur AK, Pokhrel S, Tiwari G, Pahari DP. Health care seeking behavior for common  
511 childhood illnesses in Birendranagar municipality, Surkhet, Nepal: 2018. Plos one. 2022;17(3):e0264676.



- 512 30. Mishra K, Mohapatra I, Kumar A. A study on the health seeking behavior among caregivers of  
513 under-five children in an urban slum of Bhubaneswar, Odisha. *Journal of family medicine and primary*  
514 *care*. 2019;8(2):498-503.
- 515 31. Kolola T, Gezahegn T, Addisie M. Health care seeking behavior for common childhood illnesses  
516 in Jeldu District, Oromia Regional State, Ethiopia. *PloS one*. 2016;11(10):e0164534.
- 517 32. Abegaz NT, Berhe H, Gebretekle GB. Mothers/caregivers healthcare seeking behavior towards  
518 childhood illness in selected health centers in Addis Ababa, Ethiopia: a facility-based cross-sectional  
519 study. *BMC pediatrics*. 2019;19(1):1-9.
- 520 33. Simieneh MM, Mengistu MY, Gelagay AA, Gebeyehu MT. Mothers' health care seeking behavior  
521 and associated factors for common childhood illnesses, Northwest Ethiopia: community based cross-  
522 sectional study. *BMC health services research*. 2019;19:1-7.
- 523 34. Temsesgen D, Wordofa B, Tesfaye T, Etafa W. Delay in seeking healthcare for pneumonia and  
524 associated factors among mothers/caregivers of children aged 2–59 months in public health facilities in  
525 Nekemte town, Ethiopia. *BMC pediatrics*. 2023;23(1):1-11.
- 526 35. Bantie GM, Meseret Z, Bedimo M, Bitew A. The prevalence and root causes of delay in seeking  
527 healthcare among mothers of under five children with pneumonia in hospitals of Bahir Dar city, North  
528 West Ethiopia. *BMC pediatrics*. 2019;19:1-10.
- 529 36. Umuhoza C, Karambizi AC, Tuyisenge L, Cartledge P. Caregiver delay in seeking healthcare during  
530 the acute phase of pediatric illness, Kigali, Rwanda. *The Pan African medical journal*. 2018;30.
- 531 37. Yarinbab TE, Balcha SG. Delays in utilization of institutional delivery service and its determinants  
532 in Yem Special Woreda, Southwest Ethiopia: health institution based cross-sectional study. *J Gynecol*  
533 *Women's Health*. 2018;10(3):555793.
- 534 38. Simieneh MM, Mengistu MY, Gelagay AA, Gebeyehu MT. Mothers' health care seeking behavior  
535 and associated factors for common childhood illnesses, Northwest Ethiopia: community based cross-  
536 sectional study. *BMC Health Serv Res*. 2019;19(1):59.
- 537 39. Sisay S, Endalew G, Hadgu G. Assessment of mothers/care givers health care seeking behavior  
538 for childhood illness in rural Ensaro District, north Shoa zone, Amhara region, Ethiopia 2014. *Glob J Life*  
539 *Sci Biol Res*. 2015;1(1):15.
- 540 40. Chauhan RC, Manikandan PA, Samuel A, Singh Z. Determinants of health care seeking behavior  
541 among rural population of a coastal area in South India. *Int J Sci Rep*. 2015;1(2):118-22.
- 542 41. Lungu EA, Darker C, Biesma R. Determinants of healthcare seeking for childhood illnesses among  
543 caregivers of under-five children in urban slums in Malawi: a population-based cross-sectional study.  
544 *BMC pediatrics*. 2020;20(1):1-13.
- 545 42. Gebreslasie S, Welu G, Berhane B, Gebresilassie B, Fseha B, Tsegay T, et al. Exploring knowledge  
546 on danger signs of common childhood illnesses and associated factors among mothers of under-five  
547 children in Central Tigray, Ethiopia: a cross-sectional study. *Germs*. 2020;10(1):9.
- 548 43. Kebede D, Getaneh F, Endalamaw K, Belay T, Fenta A. Prevalence of anemia and its associated  
549 factors among under-five age children in Shanan gibe hospital, Southwest Ethiopia. *BMC pediatrics*.  
550 2021;21(1):1-9.
- 551 44. Wang Z, Tang Y, Cui Y, Guan H, Cui X, Liu Y, et al. Delay in seeking health care from community  
552 residents during a time with low prevalence of COVID-19: A cross-sectional national survey in China.  
553 *Front Public Health*. 2023;11:1100715.
- 554 45. Mebratie AD, Nega A, Gage A, Mariam DH, Eshetu MK, Arsenault C. Effect of the COVID-19  
555 pandemic on health service utilization across regions of Ethiopia: An interrupted time series analysis of  
556 health information system data from 2019–2020. *PLOS global public health*. 2022;2(9):e0000843.
- 557 46. Kassile T, Lokina R, Mujinja P, Mmbando BP. Determinants of delay in care seeking among  
558 children under five with fever in Dodoma region, central Tanzania: a cross-sectional study. *Malaria*  
559 *journal*. 2014;13:1-10.

- 560 47. Salim YM, Cavallaro FL. Promptness of health-seeking behaviour among children under five  
561 years with fever in Malawi: evidence from the 2017 Malawi Malaria Indicator Survey. *Journal of Global*  
562 *Health Reports*. 2023;7:e2023032.
- 563 48. Negatou M, Ouedraogo M, Donnen P, Paul E, Samadoulougou S, Kirakoya-Samadoulougou F.  
564 Care-seeking for fever for children under the age of five before and after the free healthcare initiative in  
565 Burkina Faso: evidence from three population-based surveys. *Risk Management and Healthcare Policy*.  
566 2021:2065-77.
- 567 49. Shimelis T, Schierhout G, Tadesse BT, Dittrich S, Crump JA, Kaldor JM, et al. Timely health care  
568 seeking and first source of care for acute febrile illness in children in Hawassa, southern Ethiopia. *Plos*  
569 *one*. 2022;17(6):e0269725.
- 570 50. Babalola OJ, Ajumobi O, Ajayi IO. Rural–urban disparities and factors associated with delayed  
571 care-seeking and testing for malaria before medication use by mothers of under-five children, Igabi LGA,  
572 Kaduna Nigeria. *Malaria journal*. 2020;19:1-11.
- 573 51. Chaturvedi HK, Bajpai RC, Tiwari P. Determination of cut-off and correlates of delay in  
574 treatment-seeking of febrile illness: a retrospective analysis. *BMC Public Health*. 2020;20(1):1-9.
- 575 52. Negussie S, Chalachew G, Nigatu R, Terefe D. Residential inequalities in child mortality in  
576 Ethiopia: Multilevel and decomposition analyses. *International Journal of Population Studies*.  
577 2021;7(2):47-59.
- 578 53. Noordam AC, Carvajal-Velez L, Sharkey AB, Young M, Cals JW. Care seeking behaviour for  
579 children with suspected pneumonia in countries in sub-Saharan Africa with high pneumonia mortality.  
580 *PloS one*. 2015;10(2):e0117919.
- 581 54. Bojola F, Dessu S, Dawit Z, Alemseged F, Tessema F. Assessment of Health Care Seeking Behavior  
582 among House Hold Heads in Dale Woreda, Sidama Zone, Southern Ethiopia, Ethiopia. *Glob J Med Res*.  
583 2018;18(1):19-29.
- 584 55. Kbede AG, Alemayew M, Tafere Y, Mulu GB. Determinants of Delayed Treatment-seeking for  
585 Diarrheal Diseases among Mothers with under-five Children in North Western Ethiopia, 2020: A case-  
586 control Study. *Ethiopian Journal of Health Sciences*. 2021;31(6).
- 587 56. Geferso AT, Sharo SB. Community-based health insurance utilization and its associated factors  
588 among rural households in Akaki District, Oromia, Ethiopia, 2021. *Advances in Public Health*.  
589 2022;2022:1-12.
- 590 57. Melesse TG, Ayalew Y, Getie GA, Mitiku HZ, Tsegaye G. Prevalence and factors associated with  
591 parental traditional medicine use for children in Motta Town, Amhara Regional State, Ethiopia, 2014.  
592 *Altern Integr Med*. 2015;4(179):2.
- 593 58. Aftab W, Shipton L, Rabbani F, Sangrasi K, Perveen S, Zahidie A, et al. Exploring health care  
594 seeking knowledge, perceptions and practices for childhood diarrhea and pneumonia and their context  
595 in a rural Pakistani community. *BMC health services research*. 2018;18(1):1-10.

596



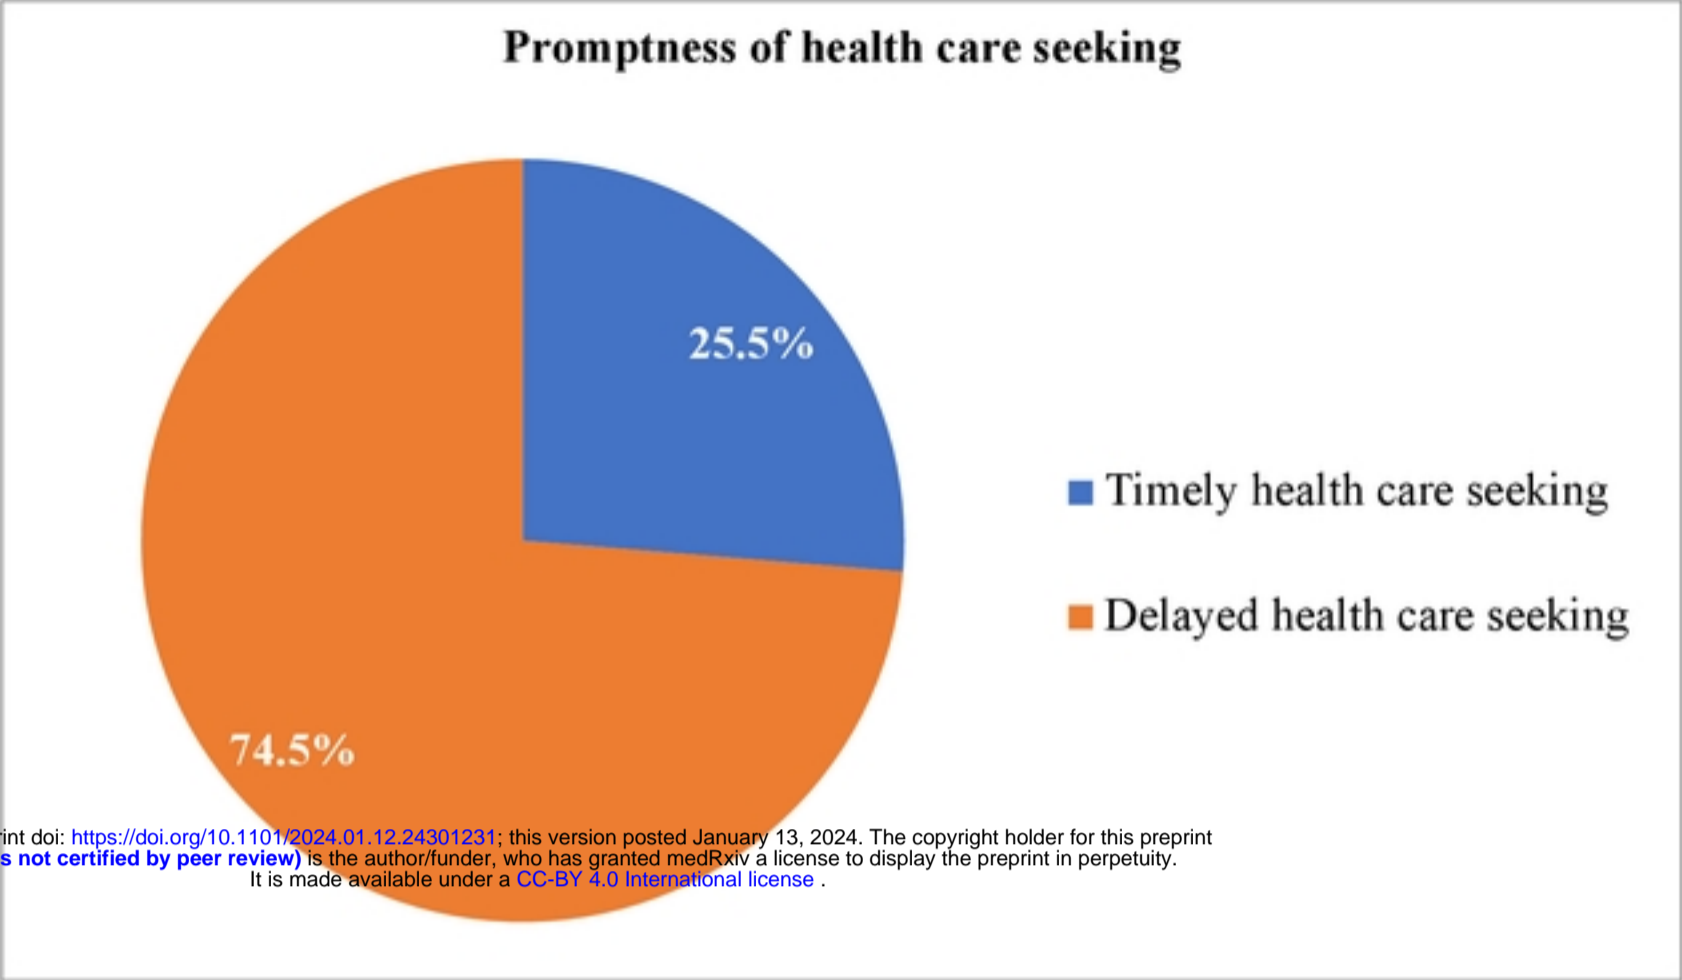

**Figure 1:** Promptness of healthcare-seeking among caregivers in Yem special woreda public health facilities, Southwestern Ethiopia, 2023 (N=326).
